# Supplementary material for: Visible-Light Activation of Persulfate or H2O2 by Fe2O3/TiO2 Immobilized on Glass Support for Photocatalytic Removal of Amoxicillin: Mechanism, Transformation Products, and Toxicity Assessment
Source: MDPI journal article supplement (doi:10.3390/nano12234328), 2022-12-05

## Supplementary Materials

# Visible-Light Activation of Persulfate or H<sub>2</sub>O<sub>2</sub> by Fe<sub>2</sub>O<sub>3</sub>/TiO<sub>2</sub> Immobilized on Glass Support for Photocatalytic Removal of Amoxicillin: Mechanism, Transformation Products, and Toxicity Assessment

Francis M. dela Rosa <sup>1,2,3</sup>, Marin Popović <sup>4</sup>, Josipa Papac Zjačić <sup>1</sup>, Gabrijela Radić <sup>1</sup>, Marijana Kraljić Roković <sup>1</sup>, Marin Kovačić <sup>1</sup>, María José Farré <sup>2</sup>, Boštjan Genorio <sup>5</sup>, Urška Lavrenčič Štangar <sup>5</sup>, Hrvoje Kušić <sup>1,\*</sup>, Ana Lončarić Božić <sup>1</sup> and Mira Petrović <sup>2,6</sup>

<sup>1</sup> Faculty of Chemical Engineering and Technology, University of Zagreb, Marulićev trg 19, 10000 Zagreb, Croatia

<sup>2</sup> Catalan Institute for Water Research (ICRA), C/Emili Grahit, 101, 17003 Girona, Spain

<sup>3</sup> Faculty of Sciences, University of Girona, 17071 Girona, Spain

<sup>4</sup> Department of Safety and Protection, Karlovac University of Applied Sciences, Trg J.J. Strossmayera 9, 47000 Karlovac, Croatia

<sup>5</sup> Faculty of Chemistry and Chemical Technology, University of Ljubljana, Vecna pot 113, 1000 Ljubljana, Slovenia

<sup>6</sup> Catalan Institution for Research and Advanced Studies (ICREA), Passeig Lluis Companys 23, 08010 Barcelona, Spain

\* Correspondence: hkusic@fkit.hr

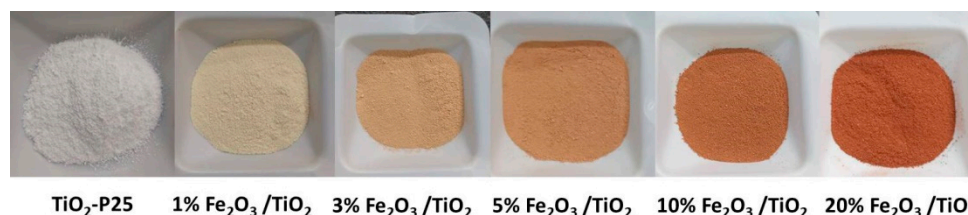

**Figure S1.** Photo images of TiO<sub>2</sub> (P25) and TiO<sub>2</sub>/Fe<sub>2</sub>O<sub>3</sub> nanocomposites

**Table S1.** FFD matrix for AMX removal rate constants ( $k_{obs}$ ) by vis-(5% Fe<sub>2</sub>O<sub>3</sub>/TiO<sub>2</sub>)/PS process after 150 min treatment

| Exp.<br># | Variables      |                | Experimental results                                     | Response, Y |
|-----------|----------------|----------------|----------------------------------------------------------|-------------|
|           | X <sub>1</sub> | X <sub>2</sub> |                                                          |             |
|           | coded          | coded          | $k_{obs}(\text{AMX}), \times 10^{-7} \text{ M min}^{-1}$ |             |
| 1         | -1             | -1             | 1.29                                                     | 1.31        |
| 2         | 0              | -1             | 1.27                                                     | 1.23        |
| 3         | 1              | -1             | 0.65                                                     | 0.66        |
| 4         | -1             | 0              | 1.48                                                     | 1.46        |
| 5         | 0              | 0              | 1.40                                                     | 1.41        |
| 6         | 1              | 0              | 0.87                                                     | 0.87        |
| 7         | -1             | 1              | 1.35                                                     | 1.34        |
| 8         | 0              | 1              | 1.30                                                     | 1.32        |
| 9         | 1              | 1              | 0.82                                                     | 0.81        |

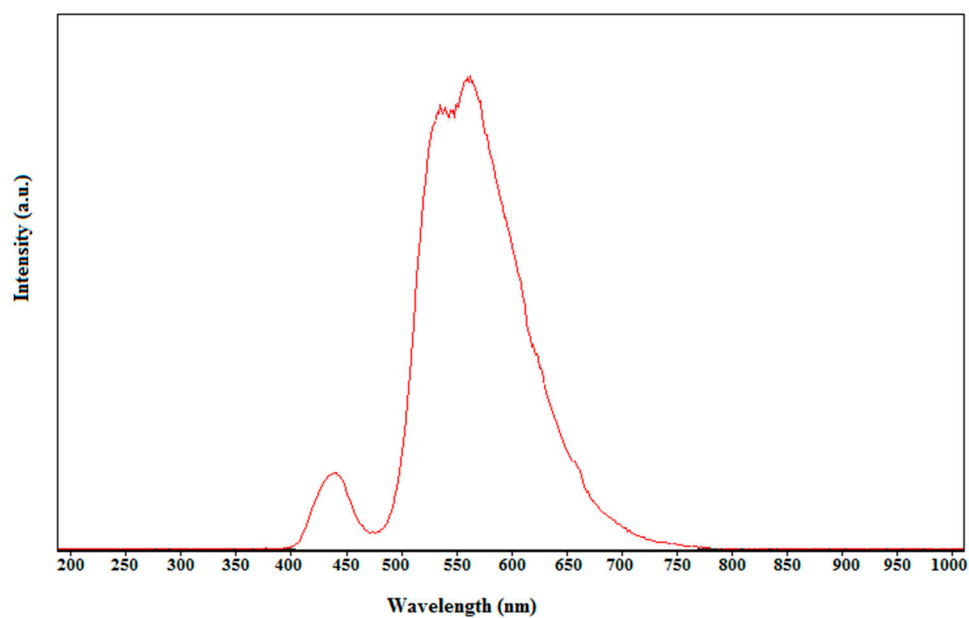**Figure S2.** Full Spectrum Coverage of LED used in PEC tests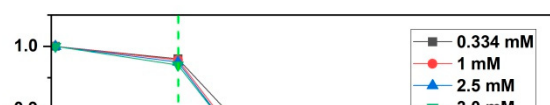

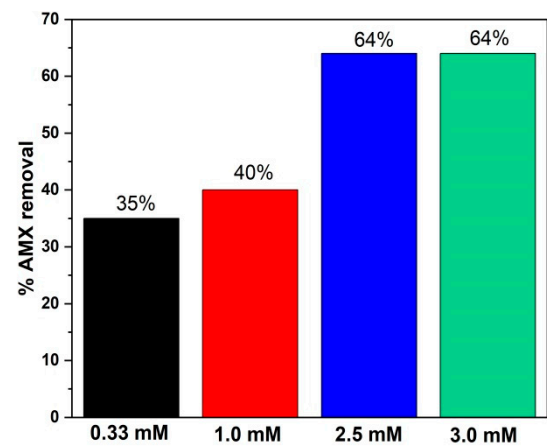

(a)

(b)

**Figure S3.** Photocatalytic removal of AMX using prepared 5%Fe<sub>2</sub>O<sub>3</sub>/TiO<sub>2</sub> under visible light irradiation with different PS concentration; (a) removal profile and (b) % removal per different PS concentration(Conditions: [catalyst dosage]= 0.5 g/L ; [AMX]= 0.05 mM ; initial pH = natural pH (5.5))

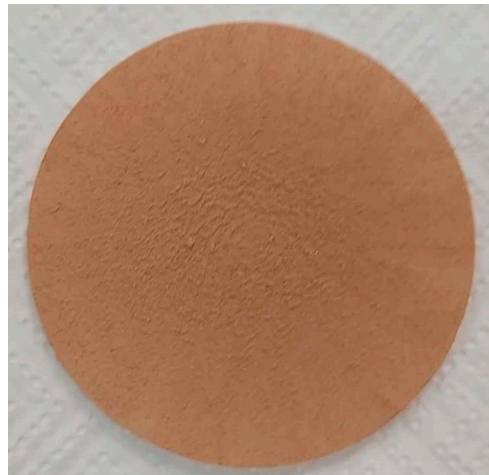

**Figure S4.** Photo image of immobilized 5% Fe<sub>2</sub>O<sub>3</sub>/TiO<sub>2</sub> nanocomposite onto glass support

**Table S2.** Analysis of variance (ANOVA) of RSM model predicting AMX removal rate constants ( $k_{obs}$ ) by vis-(5% Fe<sub>2</sub>O<sub>3</sub>/TiO<sub>2</sub>)/PS process after 150 min treatment

| Factor<br>(coded)               | Statistical analysis |    |        |        |         |
|---------------------------------|----------------------|----|--------|--------|---------|
|                                 | SS                   | df | MSS    | F      | p       |
| Model                           | 0.7014               | 5  | 0.1403 | 136.37 | 0.0010* |
| X <sub>1</sub>                  | 0.5281               | 1  | 0.5281 | 513.33 | 0.0002* |
| X <sub>1</sub> <sup>2</sup>     | 0.1217               | 1  | 0.1217 | 118.29 | 0.0017* |
| X <sub>2</sub>                  | 0.0113               | 1  | 0.0113 | 10.95  | 0.0454* |
| X <sub>2</sub> <sup>2</sup>     | 0.0374               | 1  | 0.0374 | 36.31  | 0.0092* |
| X <sub>1</sub> × X <sub>2</sub> | 0.0030               | 1  | 0.0030 | 2.94   | 0.1849  |
| Residual                        | 0.0031               | 3  | 0.0010 |        |         |
| Total                           | 0.7045               | 8  |        |        |         |

\* $p < 0.05$  means that model or model term is significant

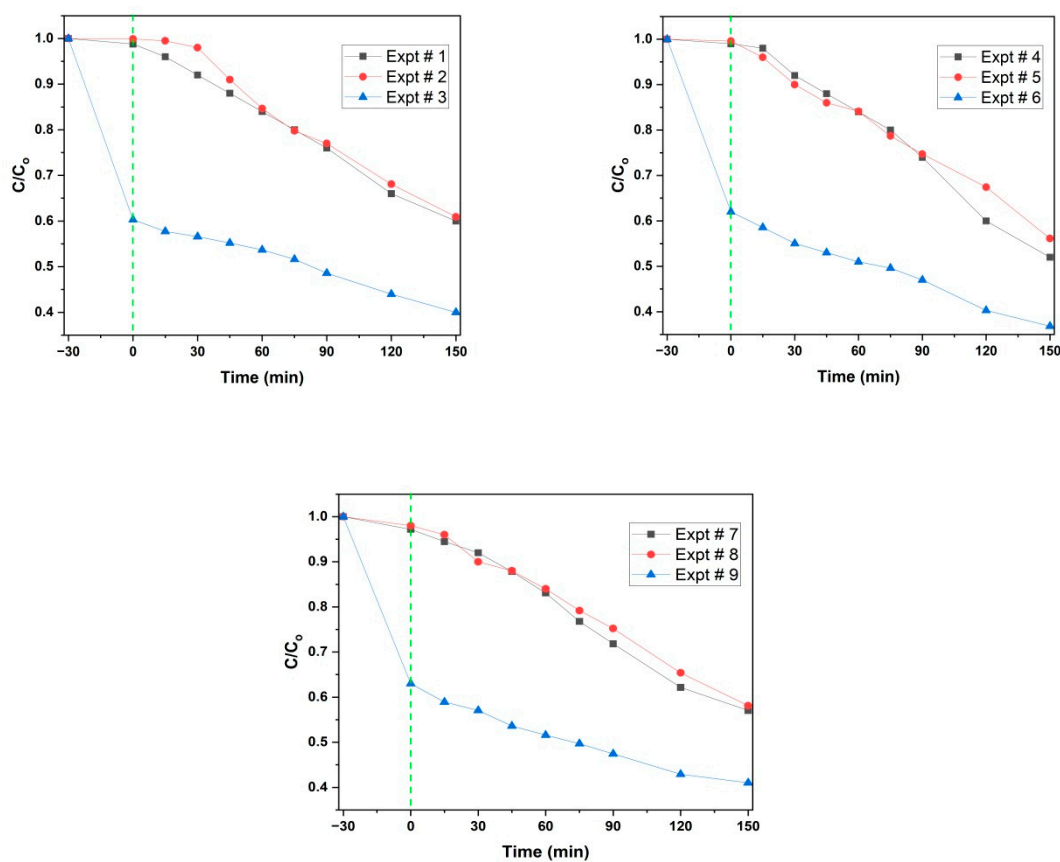**Figure S5.** AMX photocatalytic treatment by vis-(5% Fe<sub>2</sub>O<sub>3</sub>/TiO<sub>2</sub>)/PS. Experimental conditions set by FFD (Table S1, Supplementary material)

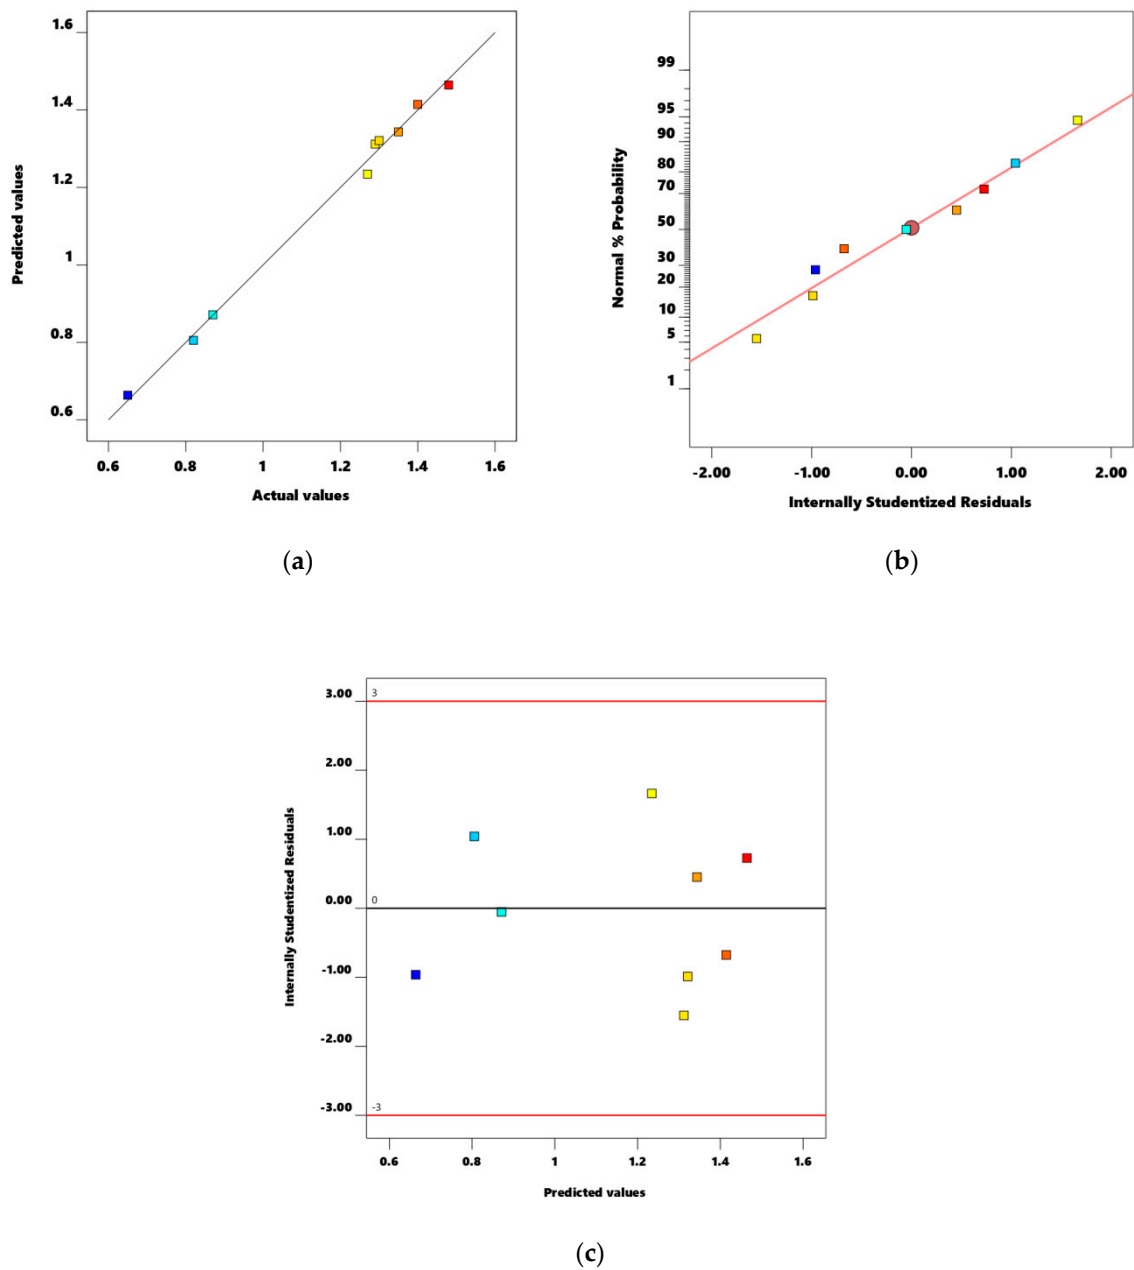

**Figure S6.** Residual diagnostics of RSM model predicting AMX removal rate constants ( $k_{obs}$ ) by vis-(5%  $\text{Fe}_2\text{O}_3/\text{TiO}_2$ )/PS process after 150 min treatment: (A) observed vs. predicted plot, (B) normal probability plot, and (C) internally studentized residuals vs. predicted values plot

**Table S3.** Accurate mass measurements found by LC-MS-Orbitrap of protonated AMX conversion products and their corresponding fragment ions

| R <sub>t</sub><br>(min) | Compound               | Chemical Formula                                                                                      | m/z<br>(Experimental) | RDBE | Annotated<br>Δmass<br>(ppm) | FISh Coverage | Suggested chemical structure                                                          | Photocatalysis | Photocatalysis<br>+<br>H <sub>2</sub> O <sub>2</sub> | Photocatalysis<br>+<br>Persulfate | Reference             |
|-------------------------|------------------------|-------------------------------------------------------------------------------------------------------|-----------------------|------|-----------------------------|---------------|---------------------------------------------------------------------------------------|----------------|------------------------------------------------------|-----------------------------------|-----------------------|
| 1.180                   | <b>AMX</b>             | C <sub>16</sub> H <sub>20</sub> N <sub>3</sub> O <sub>5</sub> S [M+H] <sup>+</sup>                    | 366.11102             | 8.5  |                             |               |                                                                                       |                |                                                      |                                   | [1,2]                 |
|                         |                        | C <sub>16</sub> H <sub>17</sub> N <sub>2</sub> O <sub>5</sub> S [M+H−(NH <sub>3</sub> )] <sup>+</sup> | 349.08459             | 9.5  |                             |               |                                                                                       |                |                                                      |                                   |                       |
|                         |                        | C <sub>15</sub> H <sub>17</sub> N <sub>2</sub> O <sub>4</sub> S                                       | 321.09079             | 8.5  | -1.68                       | 64.71         | 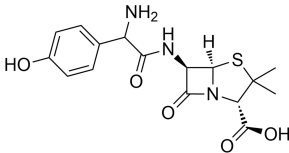   | ----           | ----                                                 | ----                              |                       |
|                         |                        | C <sub>11</sub> H <sub>8</sub> NO <sub>3</sub> S                                                      | 234.02155             | 8.5  |                             |               |                                                                                       |                |                                                      |                                   |                       |
|                         |                        | C <sub>10</sub> H <sub>10</sub> NO <sub>2</sub> S                                                     | 208.04260             | 6.5  |                             |               |                                                                                       |                |                                                      |                                   |                       |
|                         |                        | C <sub>6</sub> H <sub>10</sub> NO <sub>2</sub> S                                                      | 160.04242             | 2.5  |                             |               |                                                                                       |                |                                                      |                                   |                       |
|                         |                        | C <sub>4</sub> H <sub>4</sub> NOS                                                                     | 114.00060             | 3.5  |                             |               |                                                                                       |                |                                                      |                                   |                       |
| 0.397                   | <b>TP 382<br/>(E1)</b> | C <sub>16</sub> H <sub>20</sub> N <sub>3</sub> O <sub>6</sub> S [M+H] <sup>+</sup>                    | 382.10617             | 8.5  | -                           |               |                                                                                       |                |                                                      |                                   | Proposed<br>Structure |
|                         |                        | C <sub>16</sub> H <sub>17</sub> N <sub>2</sub> O <sub>6</sub> S [M+H−(NH <sub>3</sub> )] <sup>+</sup> | 365.07965             | 9.5  |                             |               |                                                                                       |                |                                                      |                                   |                       |
|                         |                        | C <sub>10</sub> H <sub>9</sub> N <sub>2</sub> O <sub>2</sub>                                          | 189.06583             | 7.5  |                             |               |                                                                                       | X              | ✓                                                    | ✓                                 |                       |
|                         |                        | C <sub>9</sub> H <sub>8</sub> NO <sub>2</sub>                                                         | 162.05482             | 6.5  | -1.48                       | 43.75         |  |                |                                                      |                                   |                       |
|                         |                        | C <sub>5</sub> H <sub>10</sub> NO <sub>2</sub> S                                                      | 148.04237             | 1.5  |                             |               |                                                                                       |                |                                                      |                                   |                       |
|                         |                        | C <sub>5</sub> H <sub>7</sub> O <sub>2</sub> S                                                        | 131.01610             | 2.5  |                             |               |                                                                                       |                |                                                      |                                   |                       |
|                         |                        | C <sub>5</sub> H <sub>5</sub> OS                                                                      | 113.00550             | 3.5  |                             |               |                                                                                       |                |                                                      |                                   |                       |
|                         |                        | C <sub>7</sub> H <sub>7</sub> O                                                                       | 107.04916             | 4.5  |                             |               |                                                                                       |                |                                                      |                                   |                       |
| 0.532                   | <b>TP 382</b>          | C <sub>16</sub> H <sub>20</sub> N <sub>3</sub> O <sub>6</sub> S [M+H] <sup>+</sup>                    | 382.10614             | 8.5  | -                           |               |                                                                                       |                |                                                      |                                   | Proposed              |

|       |            |                                                                                                       |           |     |       |        |                                                                                       |   |   |   |           |
|-------|------------|-------------------------------------------------------------------------------------------------------|-----------|-----|-------|--------|---------------------------------------------------------------------------------------|---|---|---|-----------|
|       | (E2)       | C <sub>16</sub> H <sub>17</sub> N <sub>2</sub> O <sub>6</sub> S [M+H−(NH <sub>3</sub> )] <sup>+</sup> | 365.07974 | 9.5 | -1.46 | 56.67  | 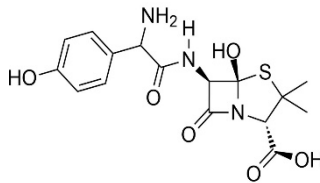   | X | ✓ | ✓ | Structure |
|       |            | C <sub>10</sub> H <sub>9</sub> N <sub>2</sub> O <sub>2</sub>                                          | 189.06616 | 7.5 |       |        |                                                                                       |   |   |   |           |
|       |            | C <sub>9</sub> H <sub>8</sub> NO <sub>2</sub>                                                         | 162.05492 | 6.5 |       |        |                                                                                       |   |   |   |           |
|       |            | C <sub>5</sub> H <sub>10</sub> NO <sub>2</sub> S                                                      | 148.04259 | 1.5 |       |        |                                                                                       |   |   |   |           |
|       |            | C <sub>5</sub> H <sub>7</sub> O <sub>2</sub> S                                                        | 131.01564 | 2.5 |       |        |                                                                                       |   |   |   |           |
|       |            | C <sub>5</sub> H <sub>5</sub> OS                                                                      | 113.00517 | 3.5 |       |        |                                                                                       |   |   |   |           |
|       |            | C <sub>7</sub> H <sub>7</sub> O                                                                       | 107.04927 | 4.5 |       |        |                                                                                       |   |   |   |           |
| 0.929 | TP 382     | C <sub>16</sub> H <sub>20</sub> N <sub>3</sub> O <sub>6</sub> S [M+H] <sup>+</sup>                    | 382.10602 | 8.5 |       |        |    | X | ✓ | ✓ | [3][4,5]  |
|       | (S-O)      | C <sub>16</sub> H <sub>17</sub> N <sub>2</sub> O <sub>6</sub> S [M+H−(NH <sub>3</sub> )] <sup>+</sup> | 365.07938 | 9.5 |       |        |                                                                                       |   |   |   |           |
|       |            | C <sub>15</sub> H <sub>17</sub> N <sub>2</sub> O <sub>5</sub>                                         | 337.08368 | 8.5 | -1.44 | 100.00 |                                                                                       |   |   |   |           |
|       |            | C <sub>9</sub> H <sub>9</sub> N <sub>2</sub> O                                                        | 161.07129 | 6.5 |       |        |                                                                                       |   |   |   |           |
| 1.106 | TP384 (H1) | C <sub>16</sub> H <sub>22</sub> N <sub>3</sub> O <sub>6</sub> S [M+H] <sup>+</sup>                    | 384.12177 | 7.5 | -1.71 | 72.73  |  | ✓ | ✓ | ✓ | [2]       |
|       |            | C <sub>16</sub> H <sub>19</sub> N <sub>2</sub> O <sub>6</sub> S [M+H−(NH <sub>3</sub> )] <sup>+</sup> | 367.09509 | 8.5 |       |        |                                                                                       |   |   |   |           |
|       |            | C <sub>15</sub> H <sub>19</sub> N <sub>2</sub> O <sub>4</sub> S                                       | 323.10626 | 7.5 |       |        |                                                                                       |   |   |   |           |
|       |            | C <sub>7</sub> H <sub>13</sub> N <sub>2</sub> O <sub>4</sub> S                                        | 189.06905 | 2.5 |       |        |                                                                                       |   |   |   |           |
|       |            | C <sub>6</sub> H <sub>10</sub> NO <sub>2</sub> S                                                      | 160.04237 | 2.5 |       |        |                                                                                       |   |   |   |           |
| 1.146 | TP384 (H2) | C <sub>16</sub> H <sub>22</sub> N <sub>3</sub> O <sub>6</sub> S [M+H] <sup>+</sup>                    | 384.12170 | 7.5 | -1.90 | 80.00  |  |   |   |   | [2]       |

|       |       |                                      |           |     |       |       |   |   |             |
|-------|-------|--------------------------------------|-----------|-----|-------|-------|---|---|-------------|
|       |       | $C_{16}H_{19}N_2O_6S [M+H-(NH_3)]^+$ | 367.09537 | 8.5 |       |       |   |   |             |
|       |       | $C_{15}H_{19}N_2O_4S$                | 323.10568 | 7.5 |       |       | ✓ | ✓ | ✓           |
|       |       | $C_7H_{13}N_2O_4S$                   | 189.06898 | 2.5 |       |       |   |   |             |
|       |       | $C_6H_{10}NO_2S$                     | 160.04245 | 2.5 |       |       |   |   |             |
| 1.200 | TP367 | $C_{16}H_{19}N_2O_6S [M+H]^+$        | 367.11459 | 7.5 | -1.70 | 66.67 |   |   |             |
|       |       | $C_{16}H_{17}N_2O_5S [M+H-(H_2O)]^+$ | 349.08456 | 8.5 |       |       |   |   | Proposed    |
|       |       | $C_{11}H_8NO_3S$                     | 234.02122 | 8.5 |       |       | ✓ | ✓ | X Structure |
|       |       | $C_6H_{10}NO_2S$                     | 160.04240 | 2.5 |       |       |   |   |             |
|       |       | $C_4H_4NOS$                          | 114.00066 | 3.5 |       |       |   |   |             |
| 1.669 | TP366 | $C_{16}H_{20}N_3O_5S [M+H]^+$        | 366.11102 | 8.5 | -1.83 | 66.67 |   |   | [2]         |
|       |       | $C_{10}H_{11}N_2O_3$                 | 207.07625 | 6.5 |       |       |   |   |             |
|       |       | $C_6H_{10}NO_2S$                     | 160.04257 | 2.5 |       |       | ✓ | ✓ | ✓           |
|       |       | $C_5H_8NS$                           | 114.03694 | 2.5 |       |       |   |   |             |

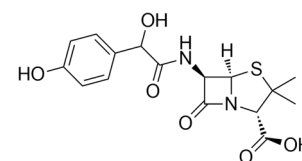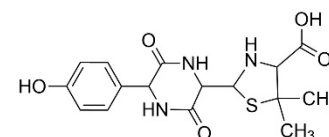

## References

- [1] J.B. Arsand, R.B. Hoff, L. Jank, L.N. Meirelles, M. Silvia Díaz-Cruz, T.M. Pizzolato, D. Barceló, Transformation products of amoxicillin and ampicillin after photolysis in aqueous matrices: Identification and kinetics, *Sci. Total Environ.* 642 (2018) 954–967. <https://doi.org/10.1016/j.scitotenv.2018.06.122>.
- [2] A.G. Trovó, R.F. Pupo Nogueira, A. Agüera, A.R. Fernandez-Alba, S. Malato, Degradation of the antibiotic amoxicillin by photo-Fenton process - Chemical and



- toxicological assessment, Water Res. 45 (2011) 1394–1402. <https://doi.org/10.1016/j.watres.2010.10.029>.
- [3] Y. Zhang, Y. Xiao, Y. Zhong, T.T. Lim, Comparison of amoxicillin photodegradation in the UV/H<sub>2</sub>O<sub>2</sub> and UV/persulfate systems: Reaction kinetics, degradation pathways, and antibacterial activity, Chem. Eng. J. 372 (2019) 420–428. <https://doi.org/10.1016/j.cej.2019.04.160>.
- [4] I. Gozlan, A. Rotstein, D. Avisar, Investigation of an amoxicillin oxidative degradation product formed under controlled environmental conditions, Environ. Chem. 7 (2010) 435–442. <https://doi.org/10.1071/EN10037>.
- [5] I. Gozlan, A. Rotstein, D. Avisar, Amoxicillin-degradation products formed under controlled environmental conditions: Identification and determination in the aquatic environment, Chemosphere. 91 (2013) 985–992. <https://doi.org/10.1016/j.chemosphere.2013.01.095>.

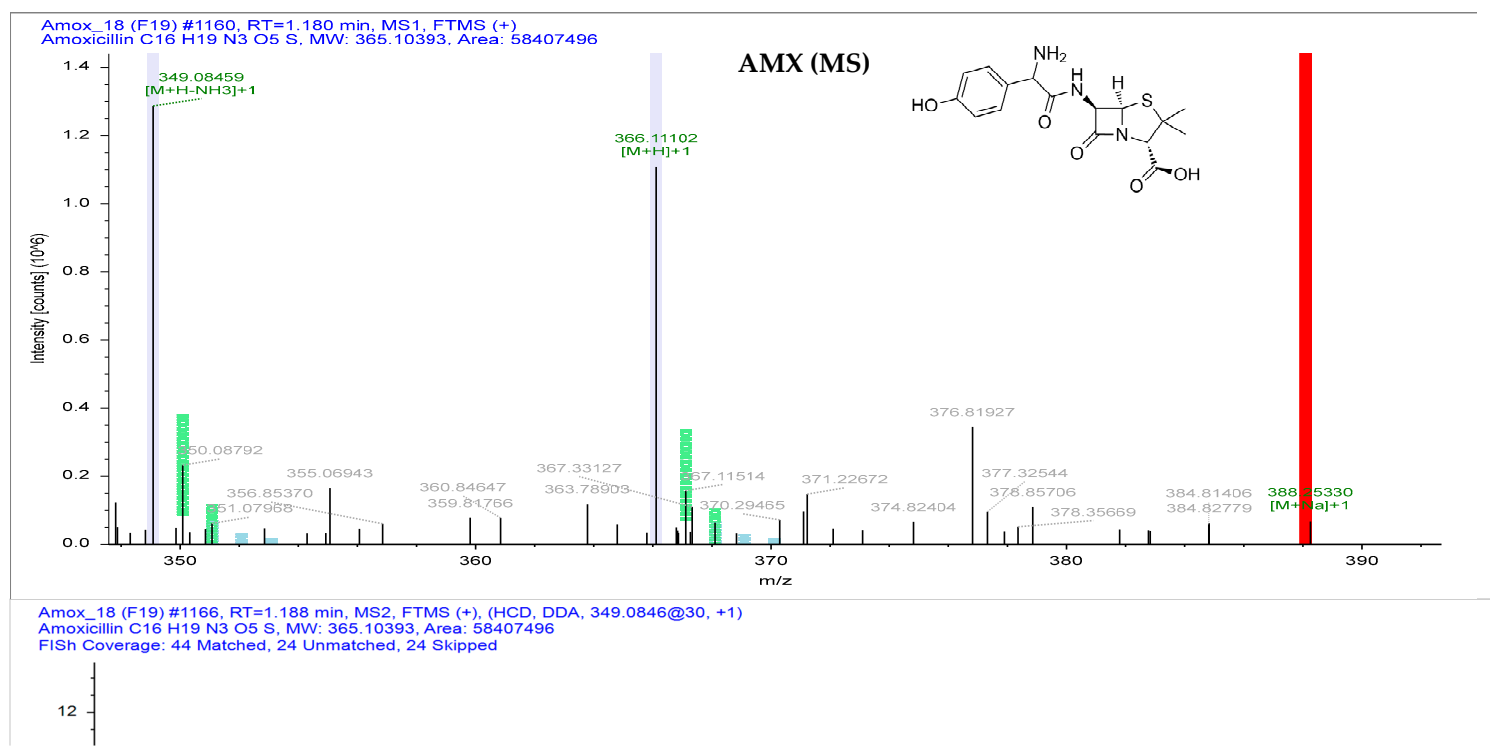

**AMX (MS 2)**

**Figure S7.** MS and MS spectra of AMX

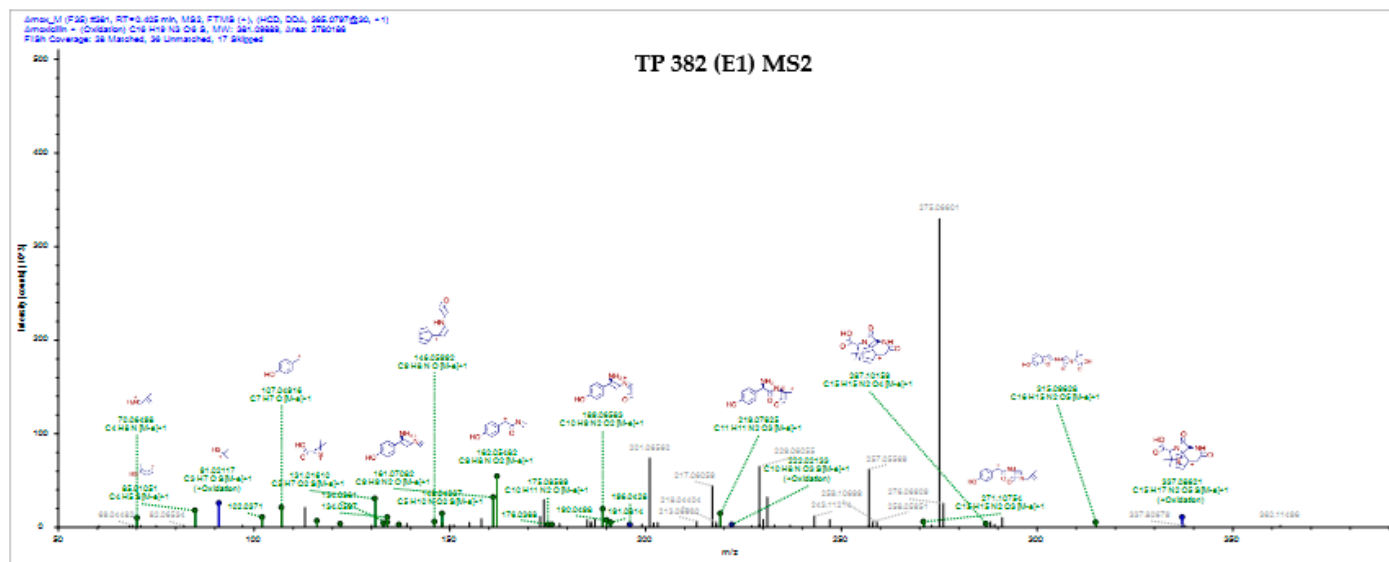

(a)

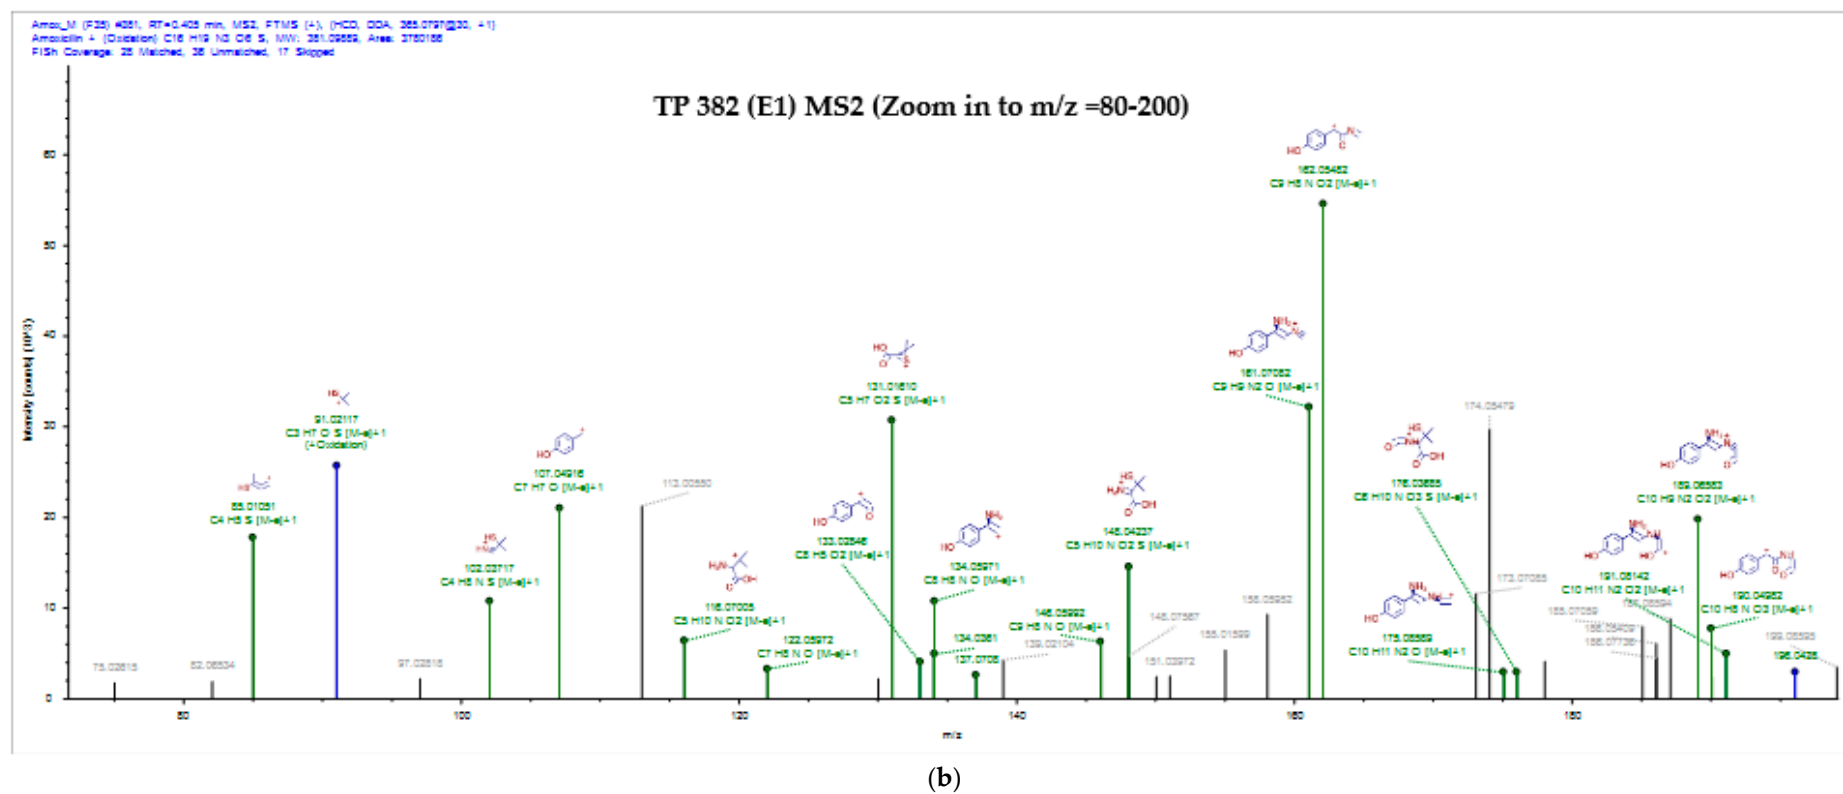

Figure S8. (a)MS and MS spectra of TP 382 (E1); (b) MS2 spectrum (magnified) of TP 382 (E1)

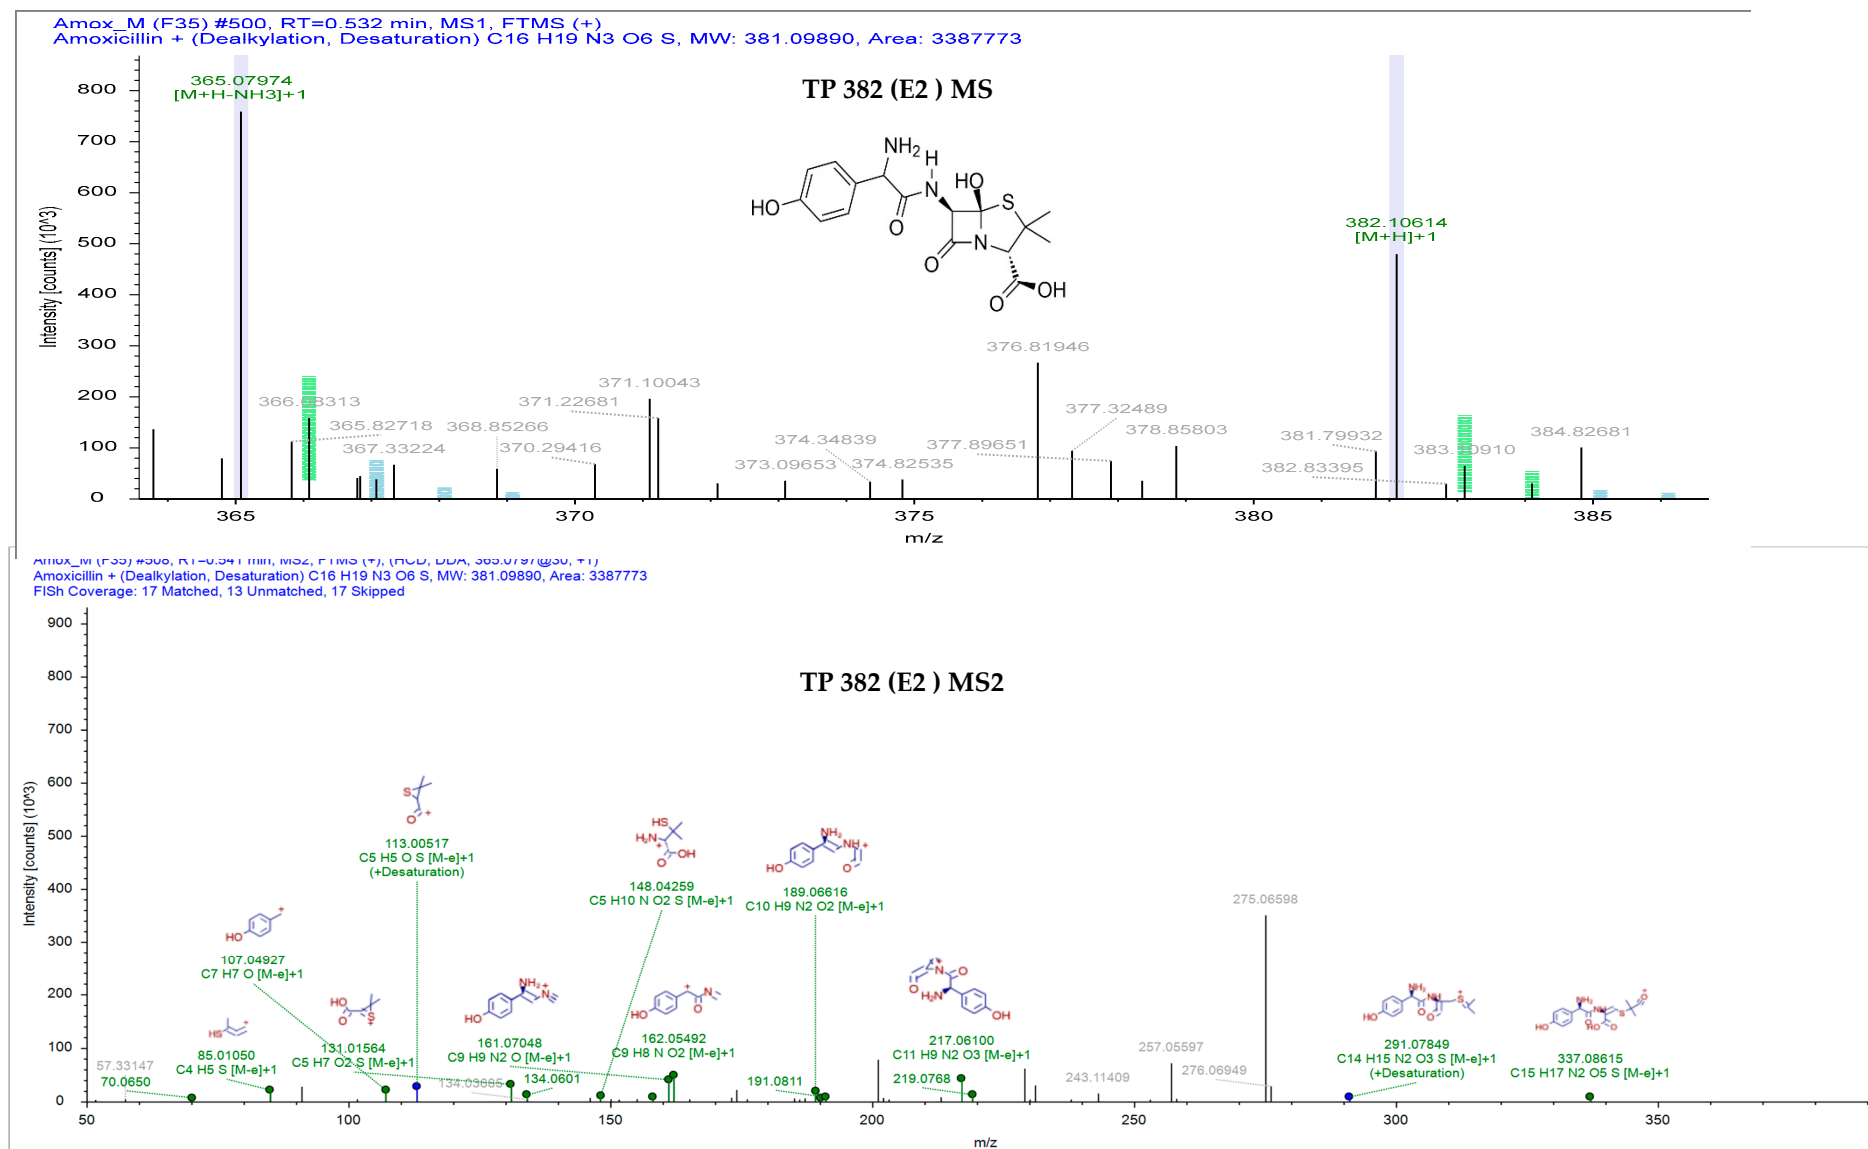

Figure S9. MS and MS2 spectra of TP 382 (E2)

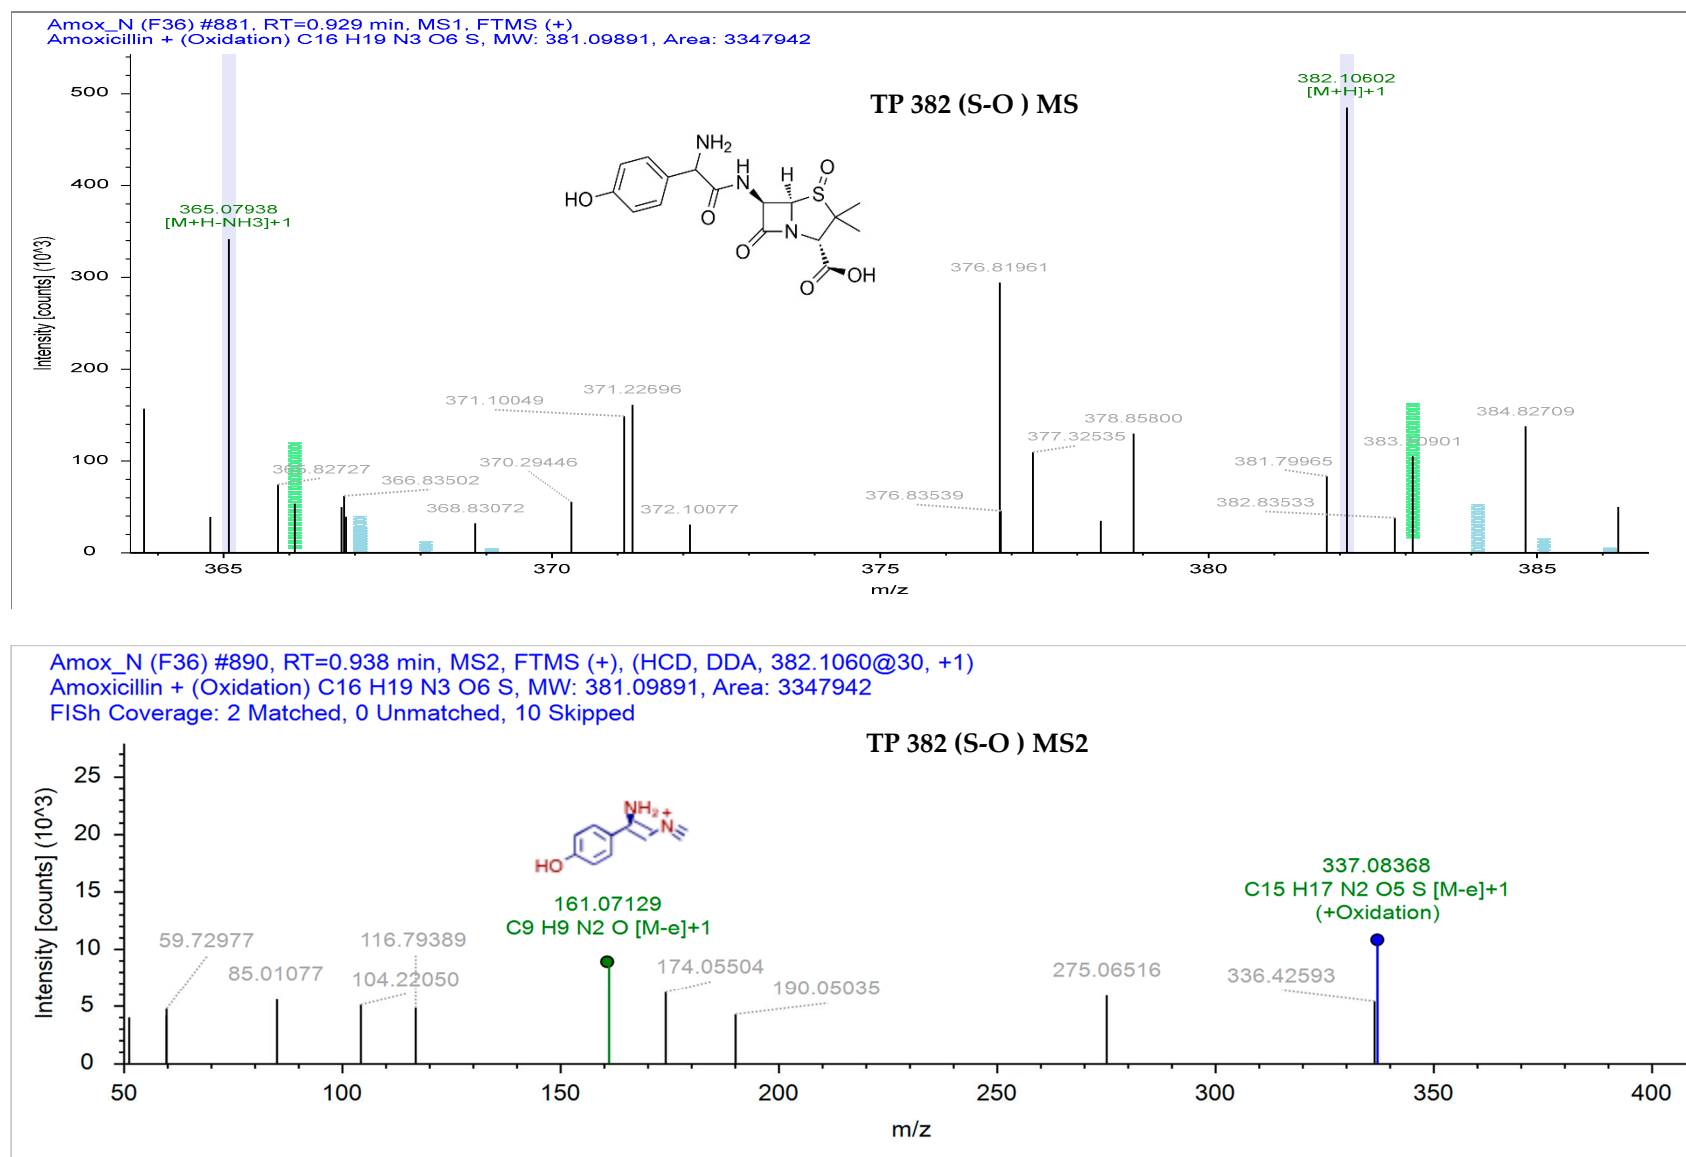

Figure S10. MS and MS2 spectra of TP 382 (S-O)

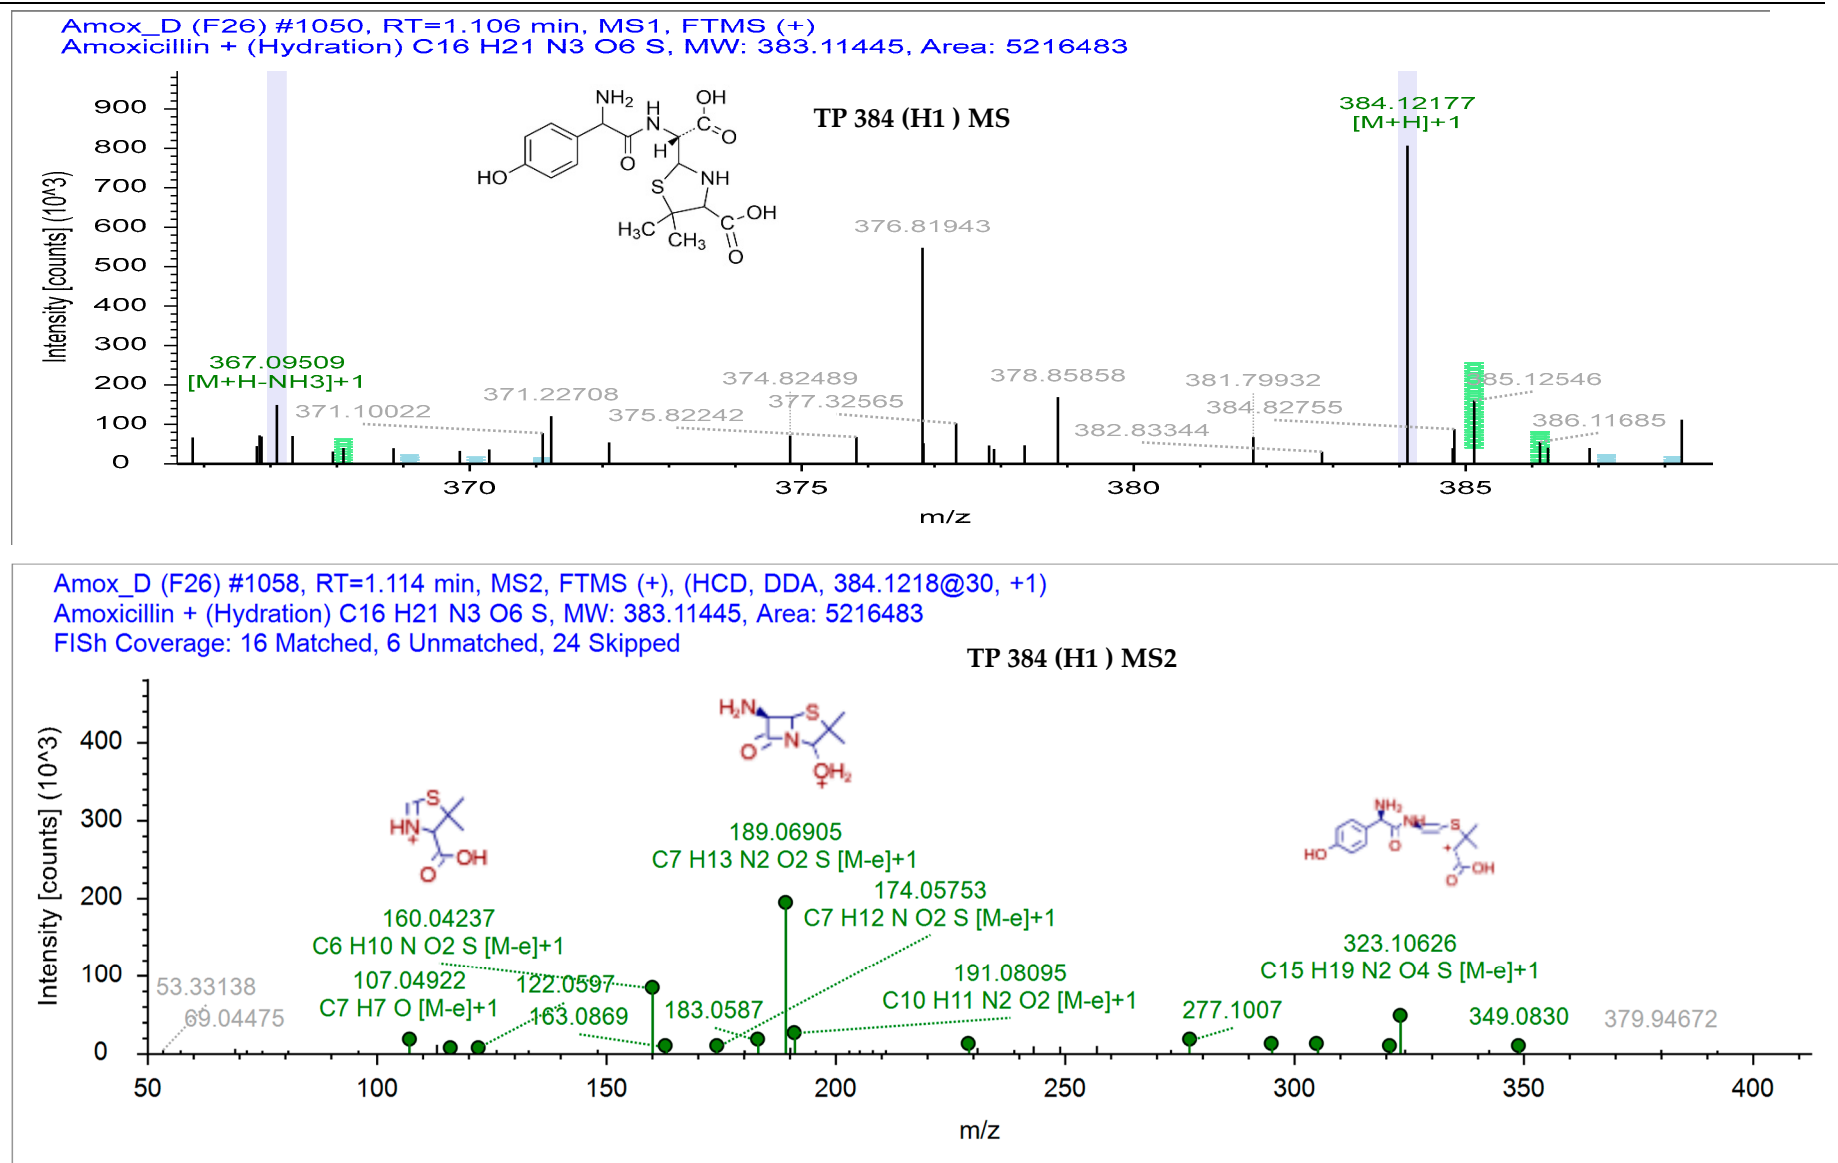

Figure S11. MS and MS2 spectra of TP 384 (H1)

Amox\_P (F38) #1090, RT=1.146 min, MS1, FTMS (+)  
Amoxicillin + (Dealkylation) C16 H21 N3 O6 S, MW: 383.11438, Area: 11441644

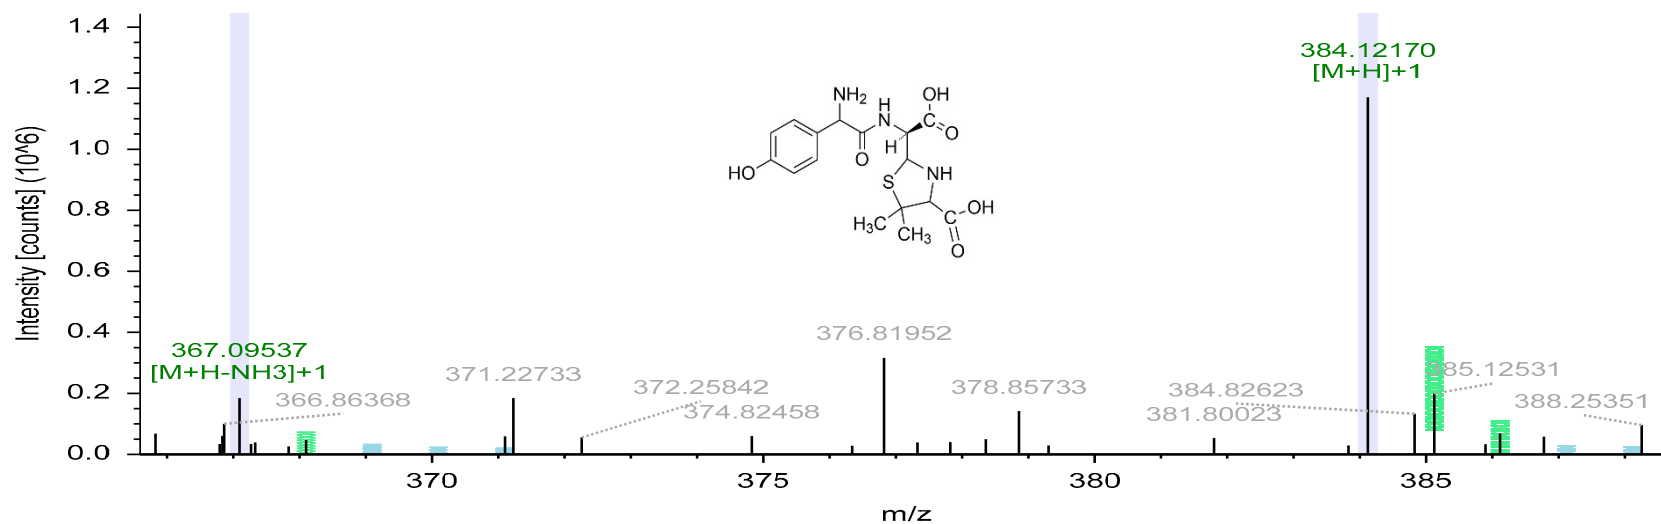

Amox\_P (F38) #1099, RT=1.155 min, MS2, FTMS (+), (HCD, DDA, 384.1217@30, +1)  
Amoxicillin + (Dealkylation) C16 H21 N3 O6 S, MW: 383.11438, Area: 11441644  
FISH Coverage: 20 Matched, 5 Unmatched, 18 Skipped

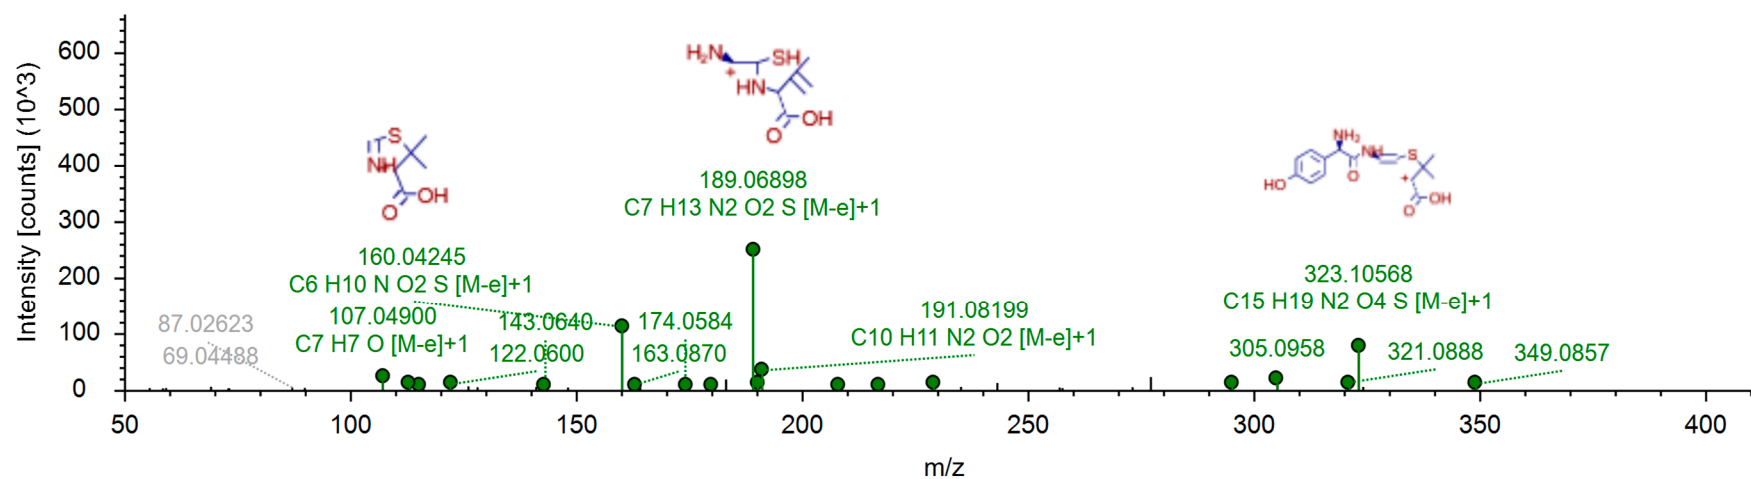

Supplement: s1 [file s1]
